# Supplementary material for: 15N NMR spectroscopy unambiguously establishes the coordination mode of the diimine linker 2-(2′-pyridyl)pyrimidine-4-carboxylic acid (cppH) in Ru(ii) complexes
Source: Royal Society of Chemistry journal article supplement (doi:10.1039/c5dt02361k), 2015-01-01
Supplement: c5dt02361k1.pdf [file c5dt02361k1.pdf]

**<sup>15</sup>N NMR spectroscopy unambiguously establishes the coordination mode of the diimine linker 2-(2'-pyridyl)pyrimidine-4-carboxylic acid (cppH) in Ru(II) complexes.**

Federica Battistin,<sup>a</sup> Gabriele Balducci,<sup>a</sup> Nicola Demitri,<sup>b</sup> Elisabetta Iengo,<sup>a</sup> Barbara Milani,<sup>a\*</sup> Enzo Alessio<sup>a\*</sup>

<sup>a</sup> Department of Chemical and Pharmaceutical Sciences, University of Trieste, Via L. Giorgieri 1, 34127 Trieste, Italy. Email: [alessi@units.it](mailto:alessi@units.it).

<sup>b</sup> Elettra – Sincrotrone Trieste, S.S. 14 Km 163.5 in Area Science Park, 34149 Basovizza – Trieste, Italy.

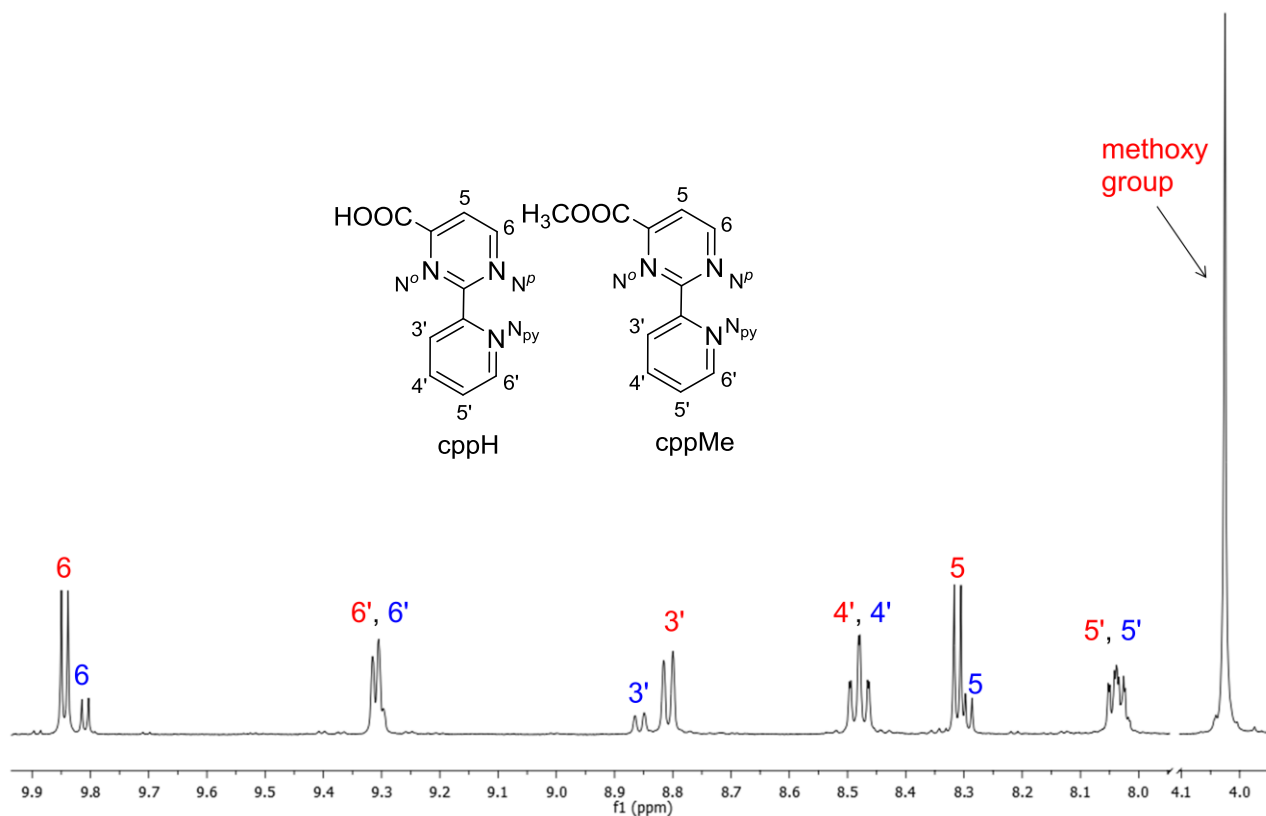

**Figure 1S.** <sup>1</sup>H NMR spectrum of a mixture of *trans,cis*-[RuCl<sub>2</sub>(CO)<sub>2</sub>(cppH)] (**5**, blue labels) and *trans,cis*-[RuCl<sub>2</sub>(CO)<sub>2</sub>(cppMe)] (**5Me**, red labels) in DMSO-*d*<sub>6</sub>. In the inset, cppH and cppMe with numbering schemes and labels.

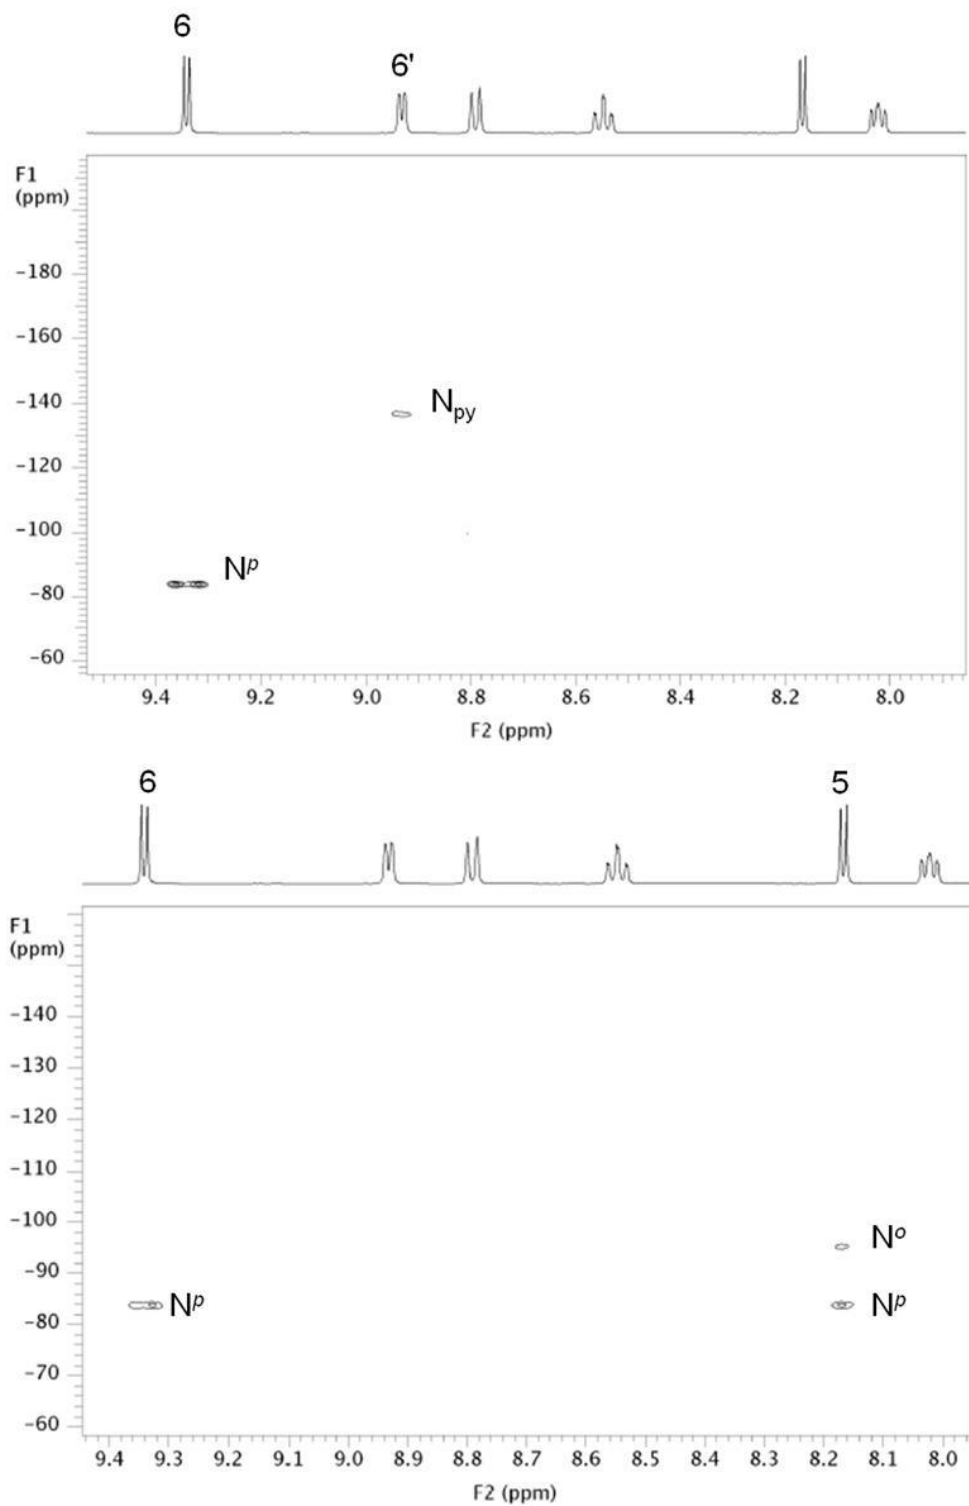

**Figure 2S.**  $\{^1\text{H}, ^{15}\text{N}\}$ -HMBC spectra of  $\text{cphH}\cdot\text{HNO}_3$  in  $\text{DMSO-}d_6$  with  $J = 11$  Hz (top) and with  $J = 1.8$  Hz (bottom). See the inset of Figure 1S for numbering scheme and labels.

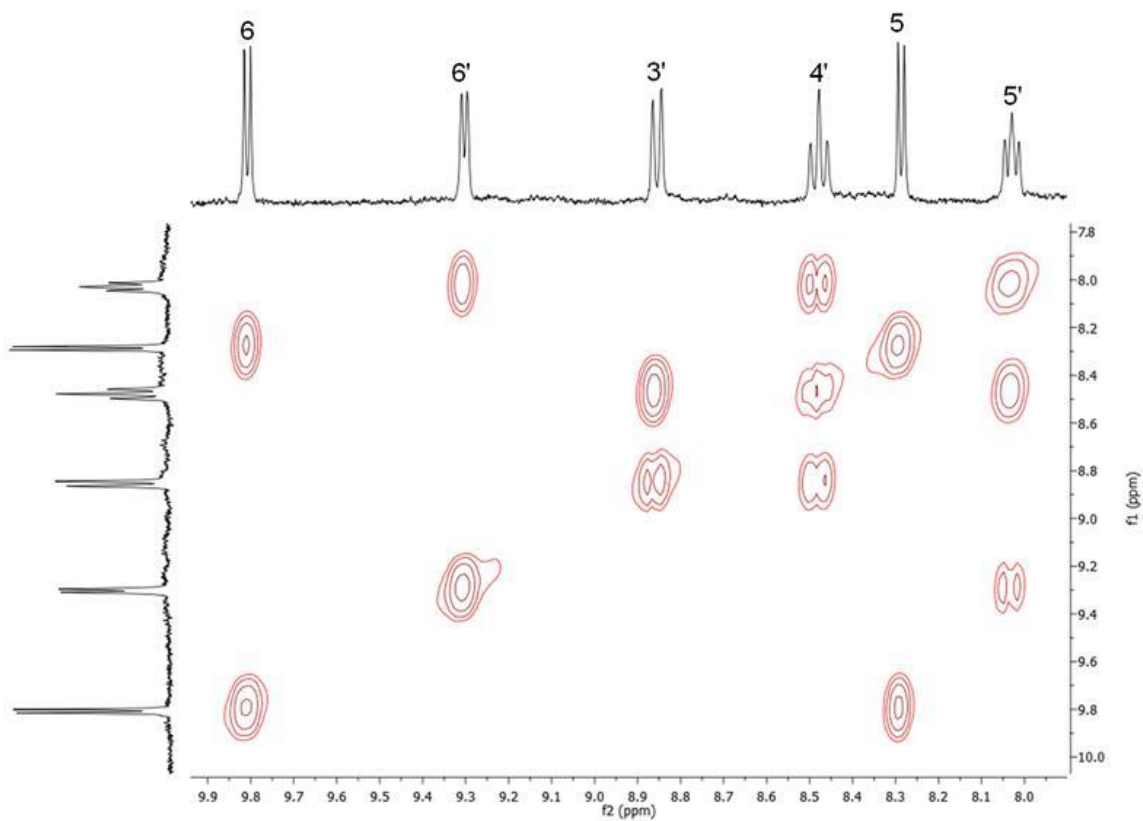

**Figure 3S.** H-H COSY NMR spectrum of *trans,cis*-[RuCl<sub>2</sub>(CO)<sub>2</sub>(cppH-κN<sup>p</sup>)] (**5**) in DMSO-*d*<sub>6</sub>. See the inset of Figure 1S for numbering scheme.

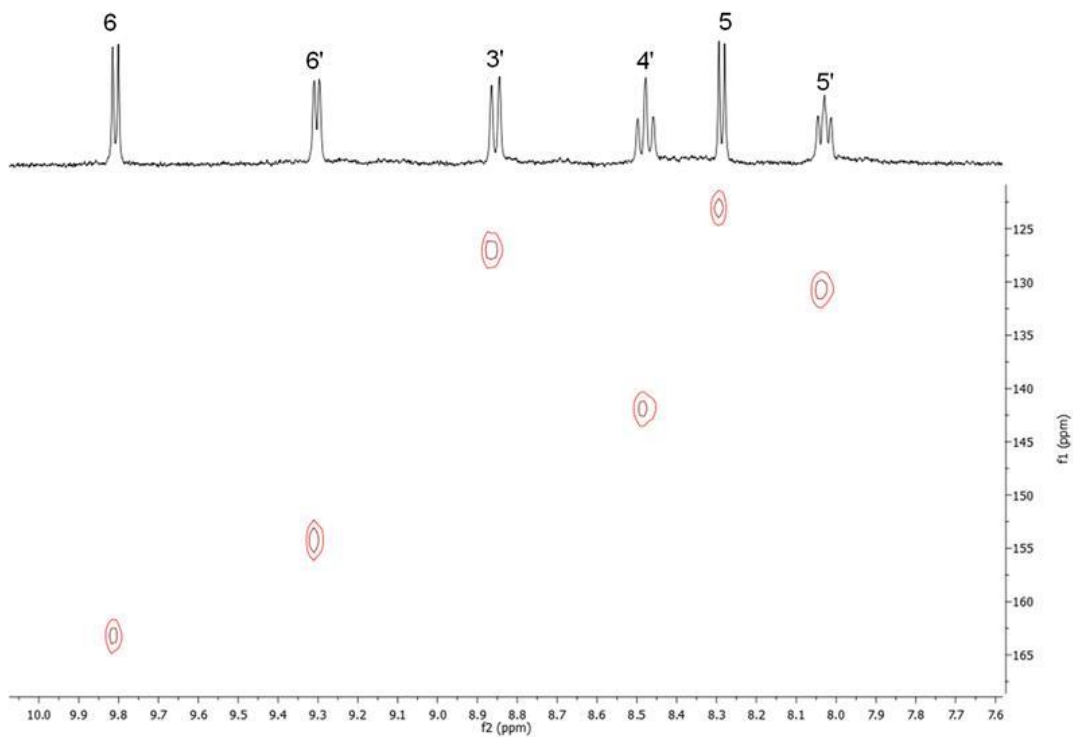

**Figure 4S.** HSQC NMR spectrum of *trans,cis*-[RuCl<sub>2</sub>(CO)<sub>2</sub>(cppH-κN<sup>p</sup>)] (**5**) in DMSO-*d*<sub>6</sub>. See the inset of Figure 1S for numbering scheme.

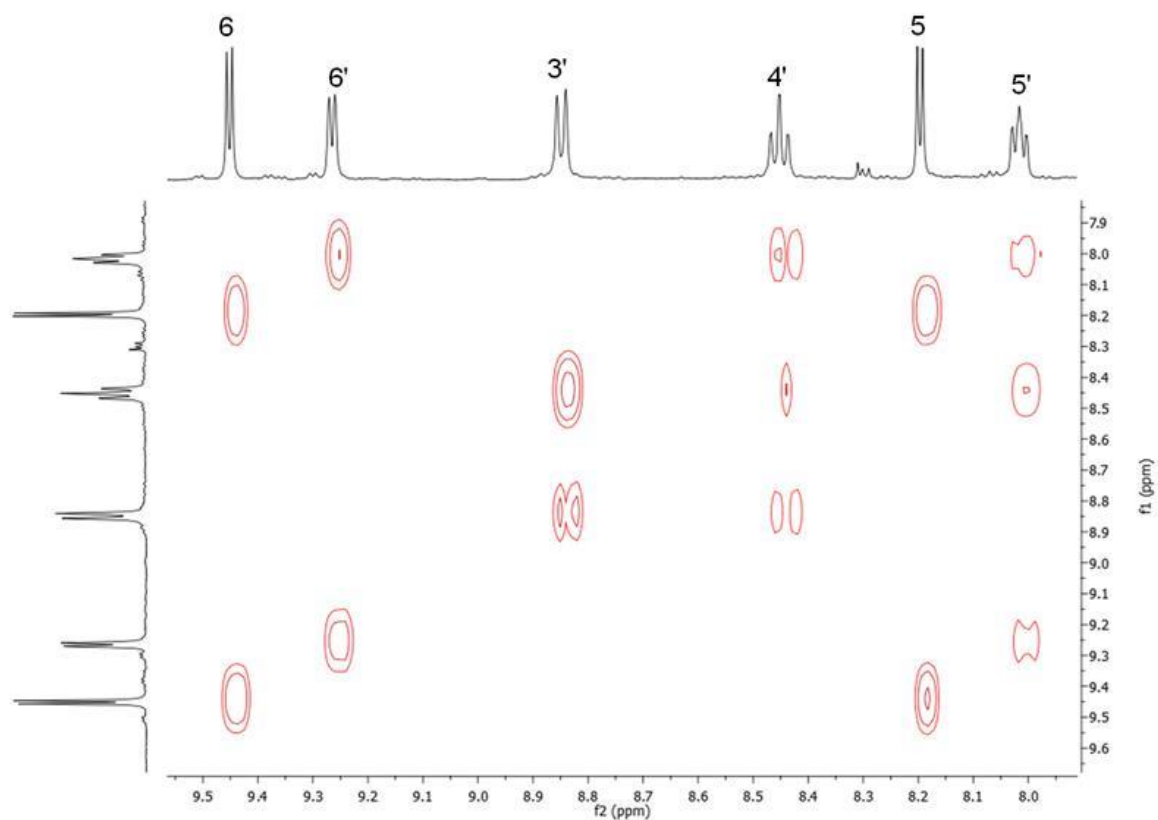

**Figure 5S.** H-H COSY NMR spectrum of *trans,cis*-[RuCl<sub>2</sub>(CO)<sub>2</sub>(cppH-κN<sup>p</sup>)] (**6**) in DMSO-*d*<sub>6</sub>. See the inset of Figure 1S for numbering scheme.

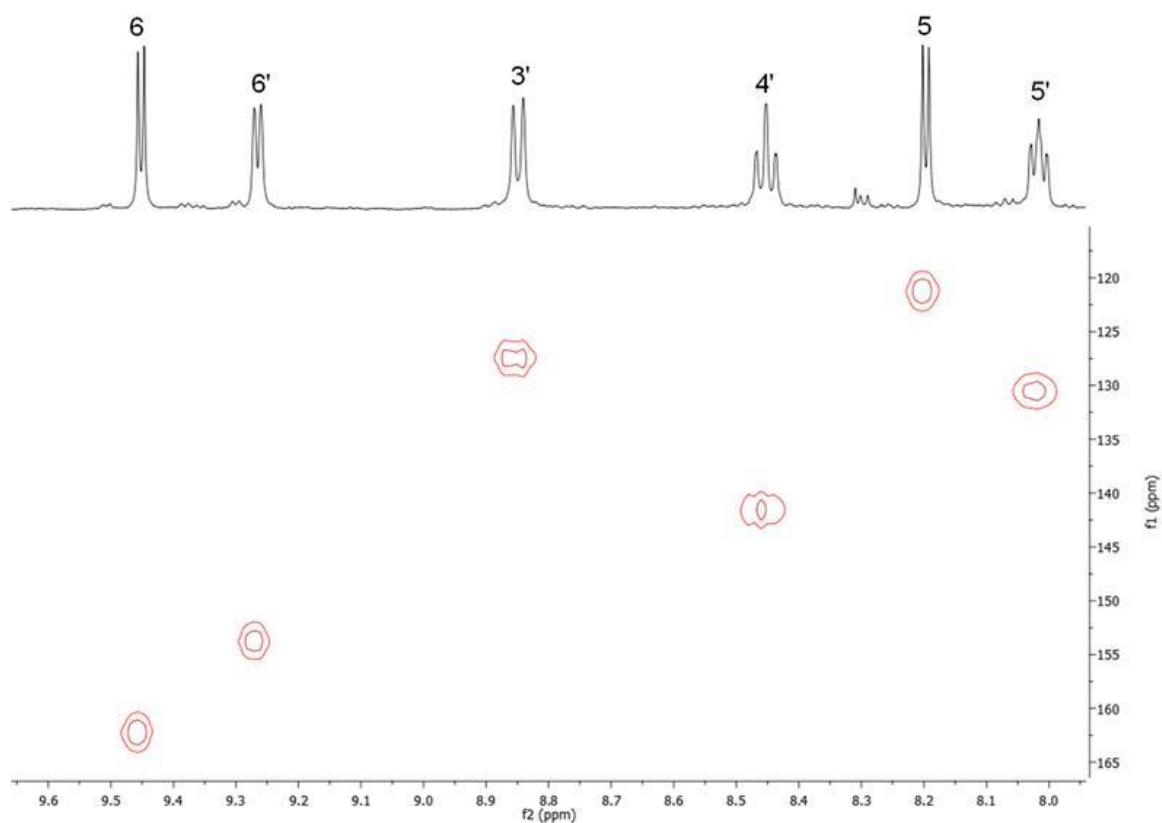

**Figure 6S.** HSQC NMR spectrum of *trans,cis*-[RuCl<sub>2</sub>(CO)<sub>2</sub>(cppH-κN<sup>p</sup>)] (**6**) in DMSO-*d*<sub>6</sub>. See the inset of Figure 1S for numbering scheme.

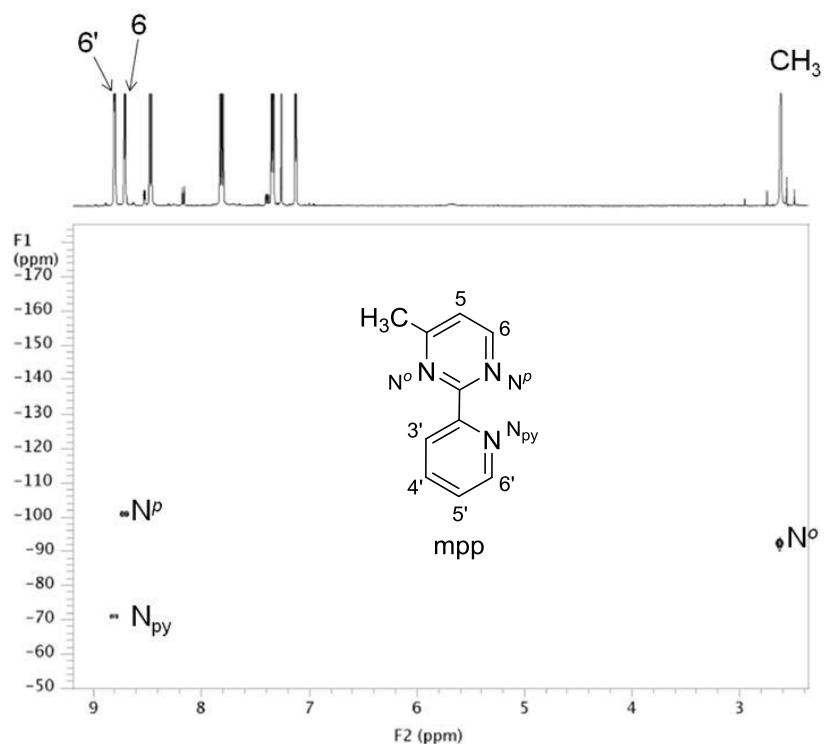

**Figure 7S.**  $\{^1\text{H}, ^{15}\text{N}\}$ -HMBC spectrum of mpp with  $J = 11$  Hz in  $\text{CDCl}_3$ . In the inset, mpp with numbering scheme and labels.

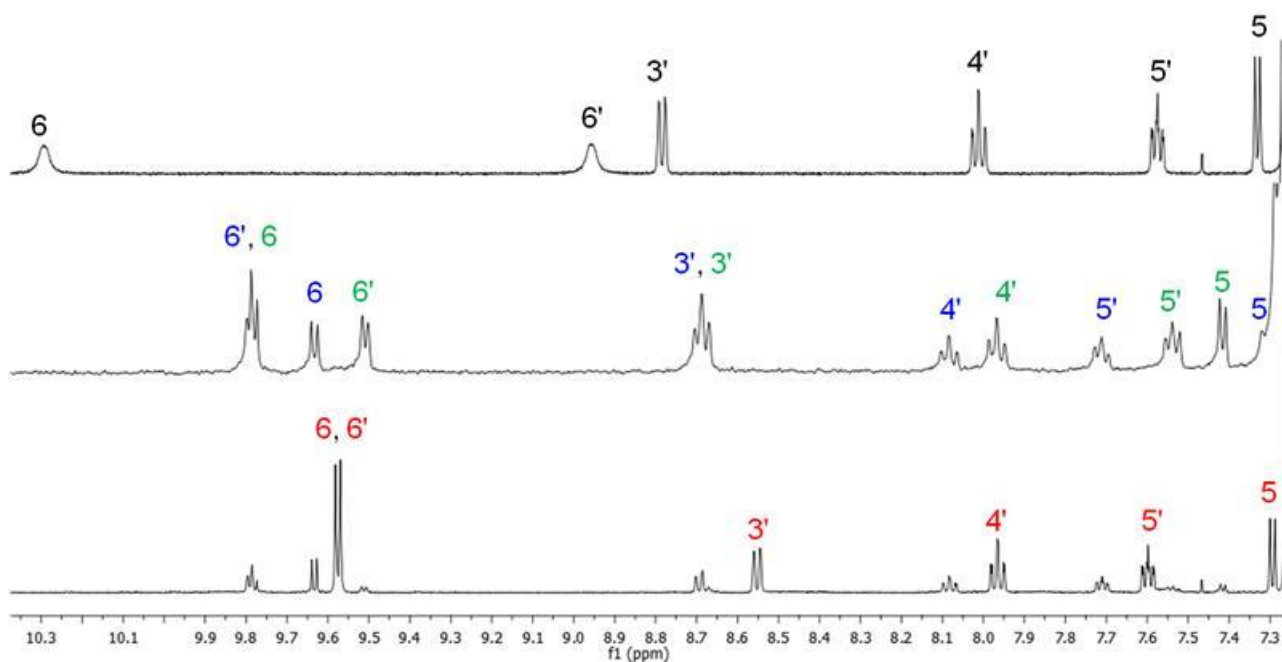

**Figure 8S.**  $^1\text{H}$  NMR spectra (aromatic region) of *cis,trans*- $[\text{RuCl}_2(\text{dmsO-S})_2(\text{mpp-}\kappa\text{N}^p)]$  (**7**, bottom, with minor amounts of **8** and **9**), a mixture of the two *cis,cis*- $[\text{RuCl}_2(\text{dmsO-S})_2(\text{mpp-}\kappa\text{N}^p)]$  isomers (**8** + **9**, middle), and *trans,cis*- $[\text{RuCl}_2(\text{dmsO-S})_2(\text{mpp-}\kappa\text{N}^p)]$  (**10**, top) in  $\text{CDCl}_3$ . See the inset of Figure 7S for numbering scheme.

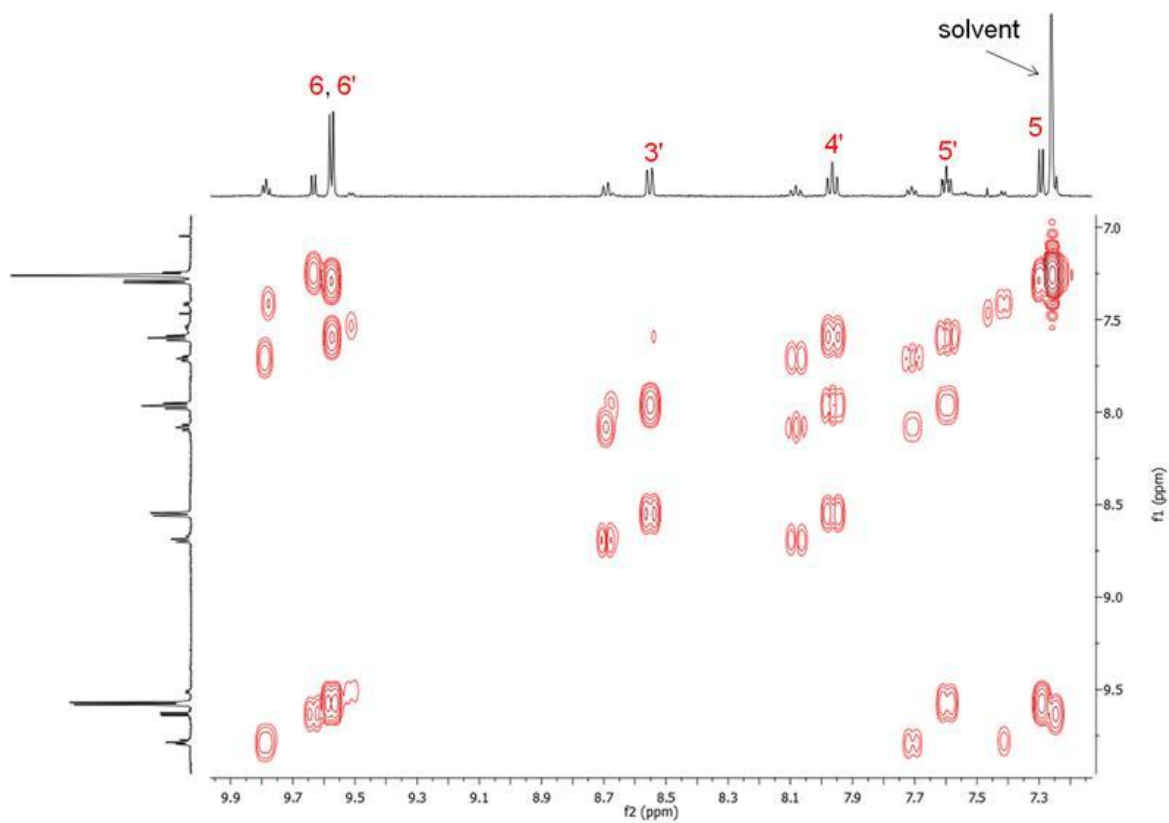

**Figure 9S.** H-H COSY NMR spectrum (aromatic region) of *cis,trans*-[RuCl<sub>2</sub>(dmsO-S)<sub>2</sub>(mpp-κN<sup>p</sup>)] (**7**, with minor amounts of **8** and **9**) in CDCl<sub>3</sub>. See the inset of Figure 7S for numbering scheme.

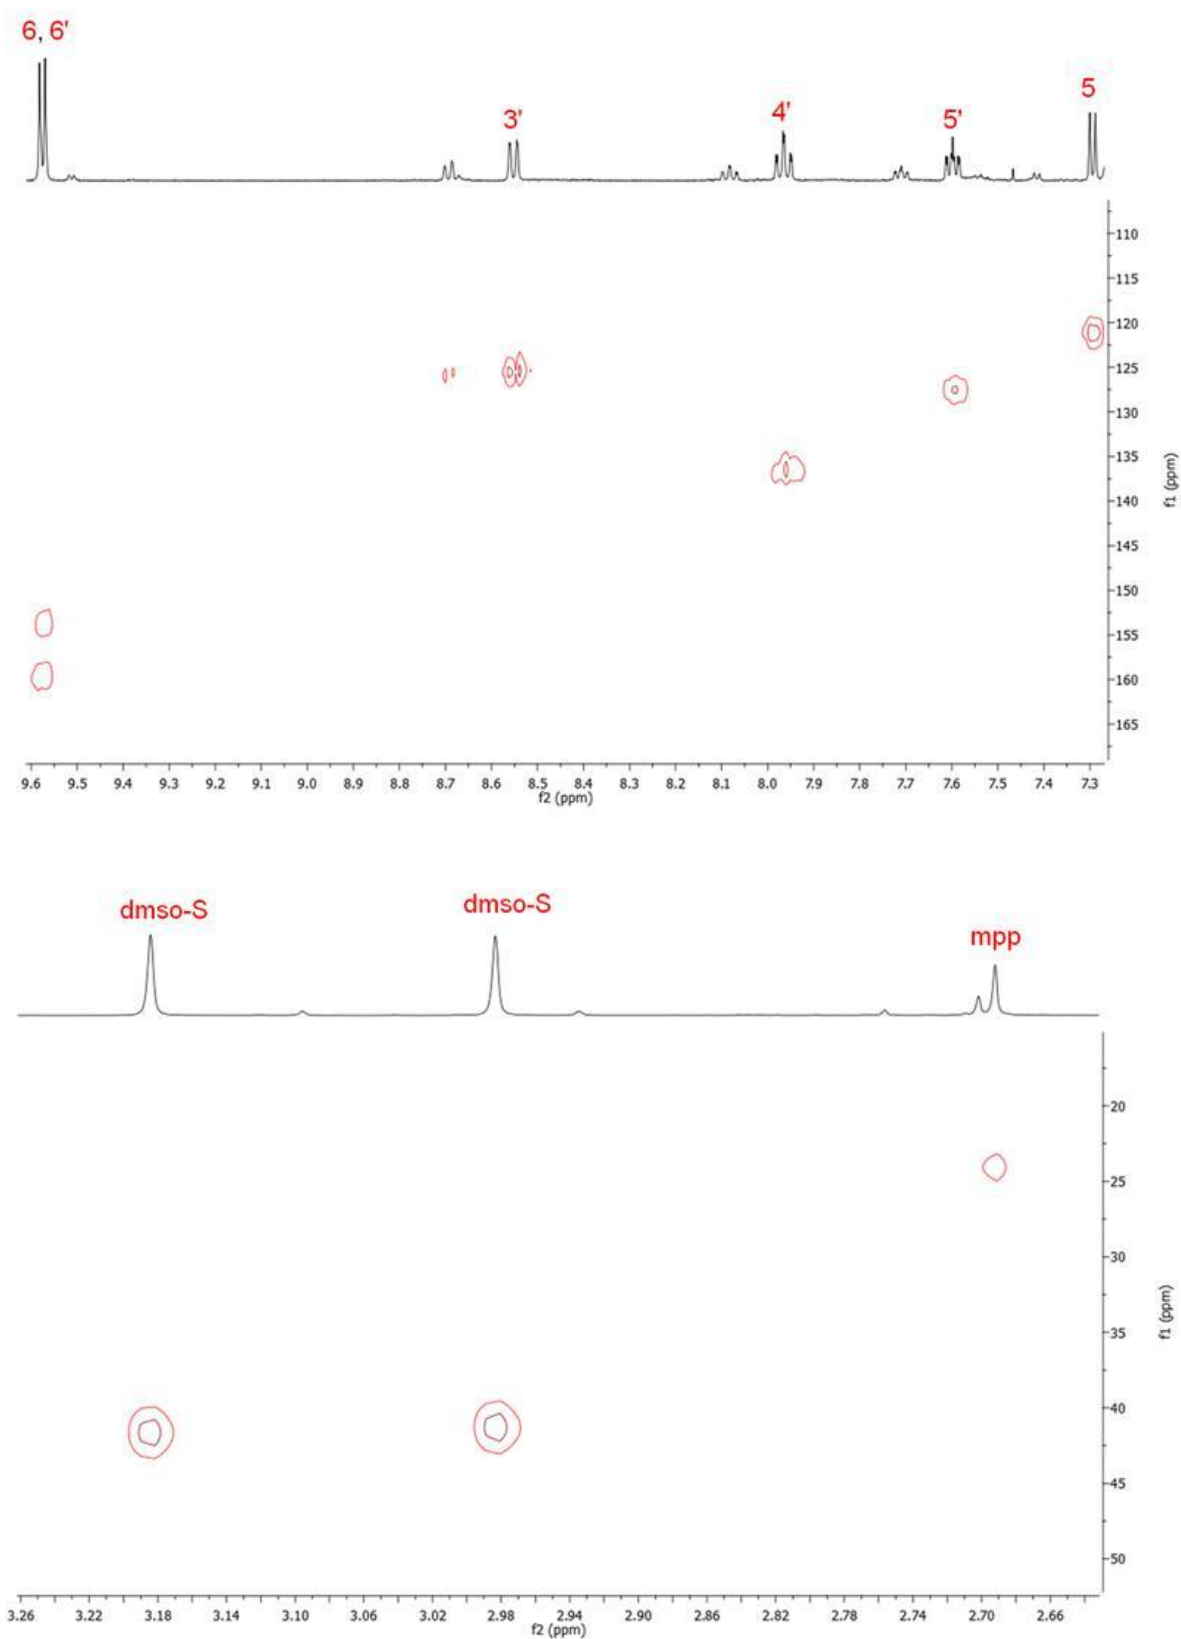

**Figure 10S.** HSQC NMR spectrum of *cis,trans*-[RuCl<sub>2</sub>(dmsO-S)<sub>2</sub>(mpp-κN<sup>P</sup>)] (**7**), with minor amounts of **8** and **9** in CDCl<sub>3</sub>: aromatic region (top) and methyl region (bottom). See the inset of Figure 7S for numbering scheme.



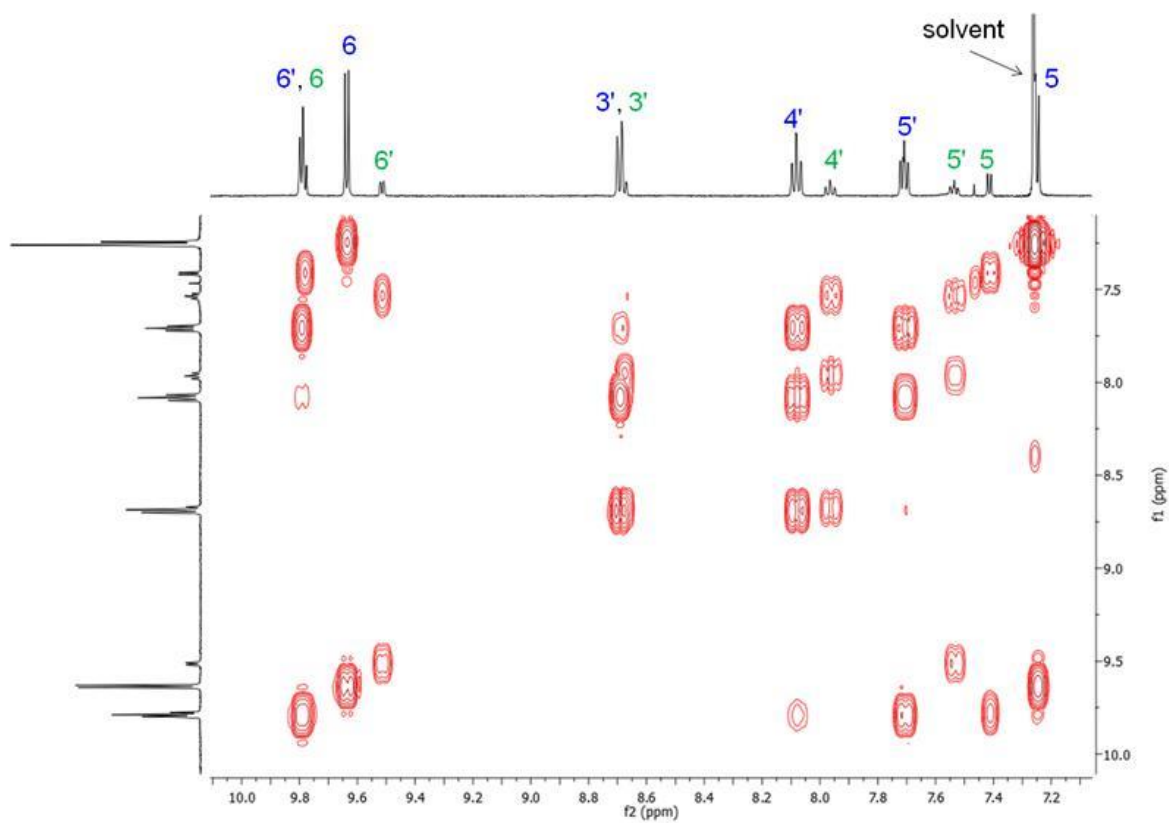

**Figure 11S.** H-H COSY NMR spectrum (aromatic region) of a mixture of the two *cis,cis*-[RuCl<sub>2</sub>(dmsO-S)<sub>2</sub>(mpp-κN<sup>P</sup>)] isomers (**8** + **9**) in CDCl<sub>3</sub>. See the inset of Figure 7S for numbering scheme.

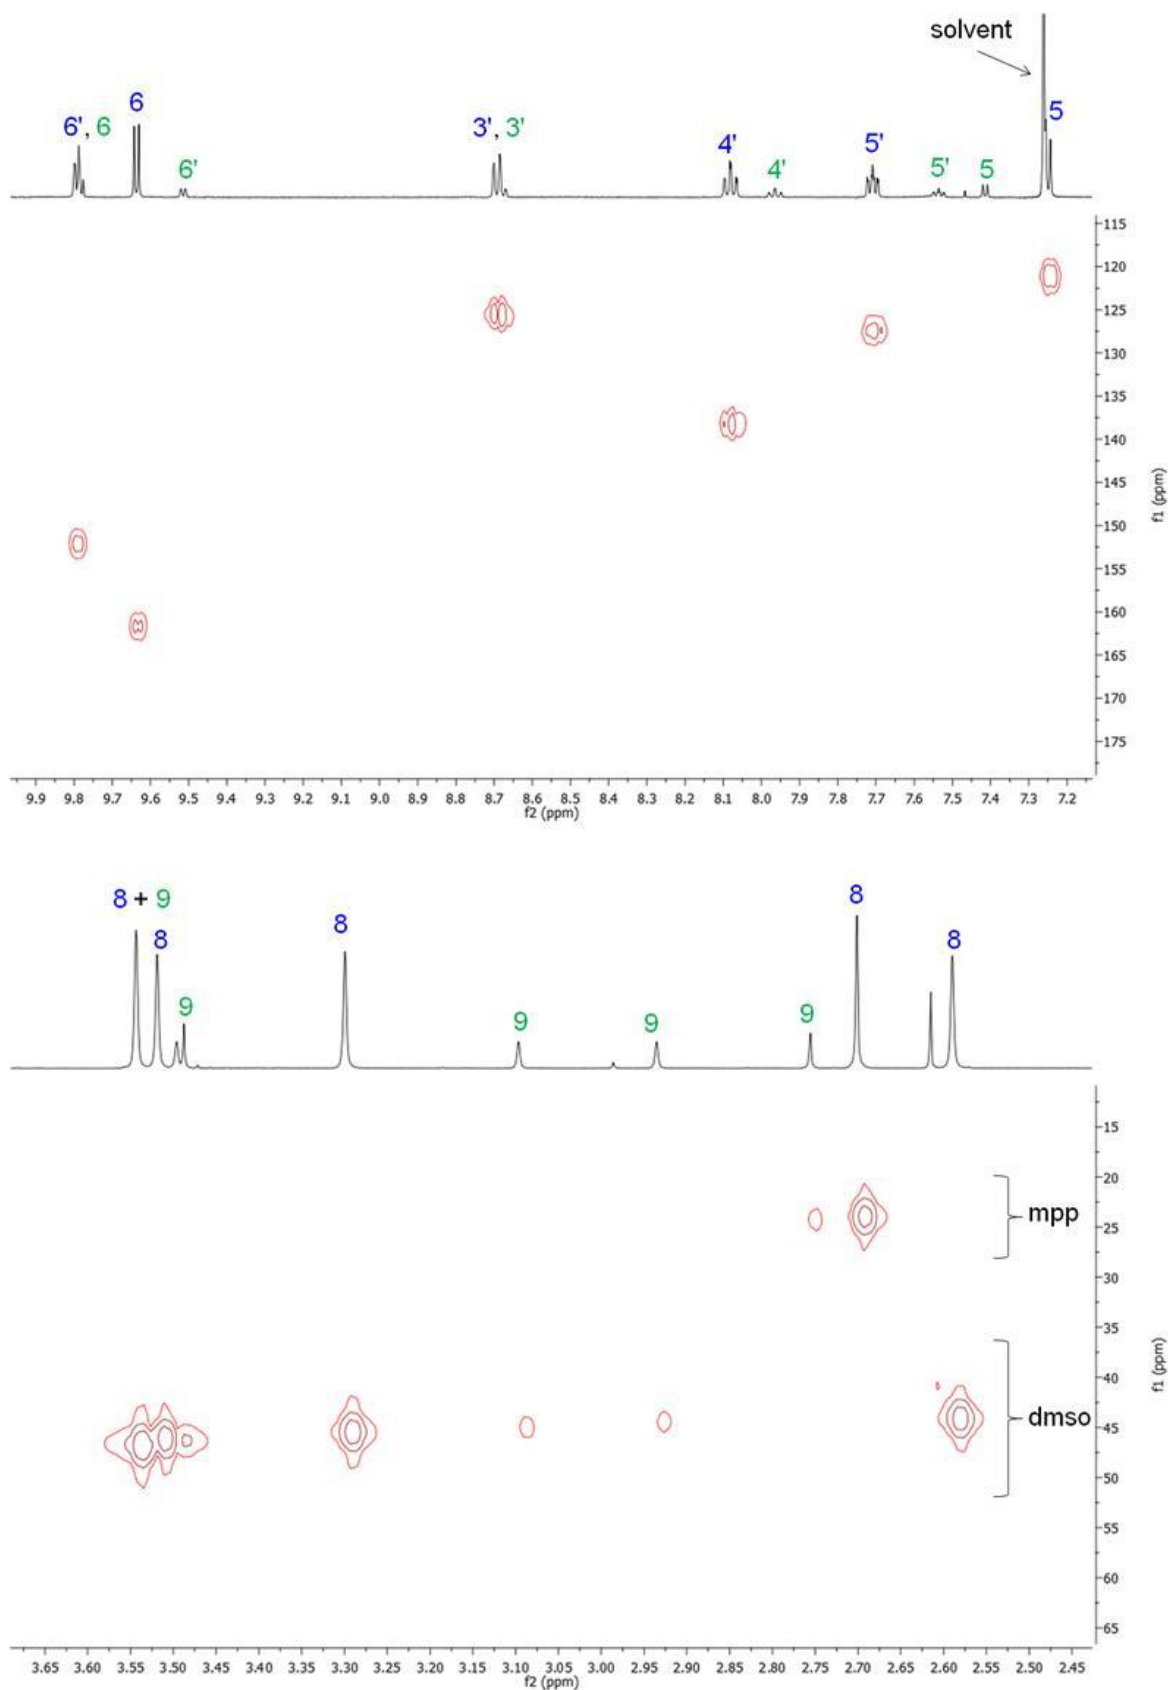

**Figure 12S.** HSQC NMR spectrum of a mixture of the two *cis,cis*-[RuCl<sub>2</sub>(dms0-S)<sub>2</sub>(mpp-κN<sup>p</sup>)] isomers (**8** + **9**) in CDCl<sub>3</sub>: aromatic region (top) and methyl region (bottom). See the inset of Figure 7S for numbering scheme.

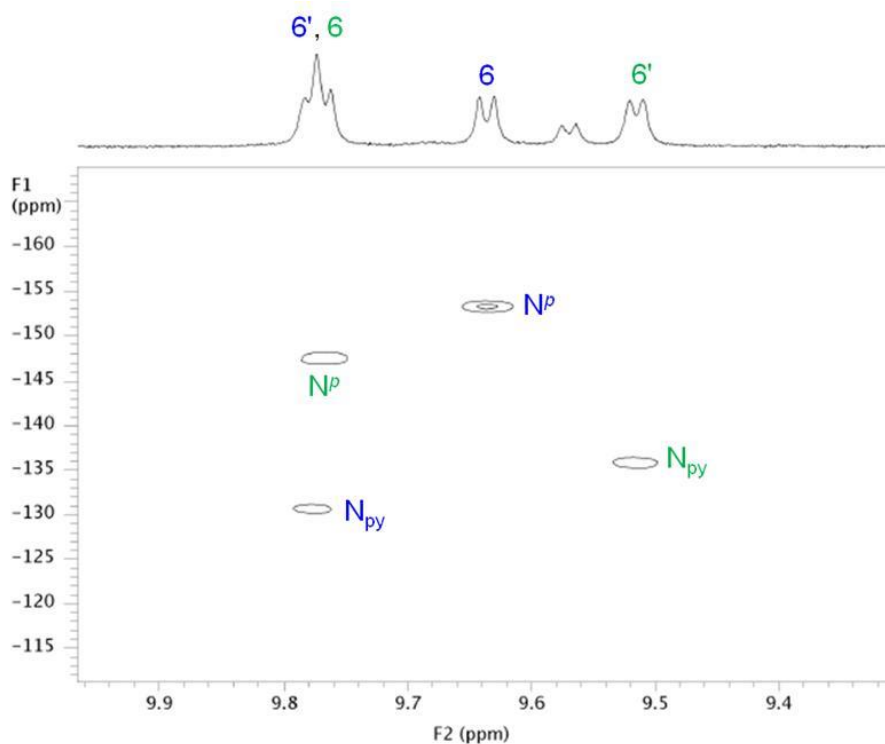

**Figure 13S.**  $\{^1\text{H}, ^{15}\text{N}\}$ - HMBC spectrum (aromatic resonances of mpp) of a mixture of the two *cis,cis*- $[\text{RuCl}_2(\text{dmsO-S})_2(\text{mpp-}\kappa\text{N}^p)]$  isomers (**8** + **9**) with  $J = 11$  Hz in  $\text{CDCl}_3$ . See the inset of Figure 7S for numbering scheme and labels.

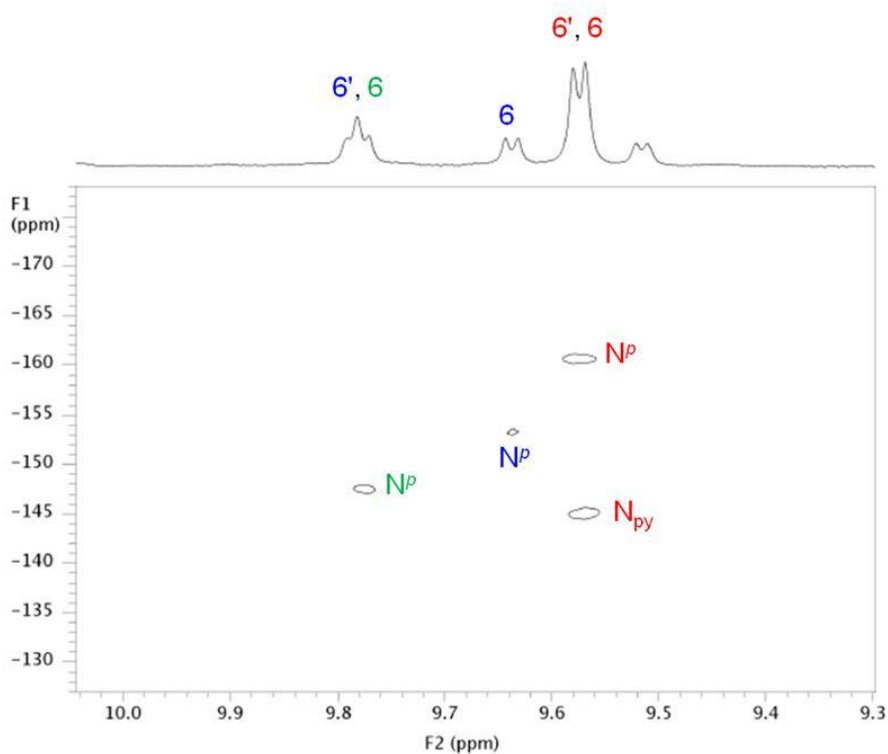

**Figure 14S.**  $\{^1\text{H}, ^{15}\text{N}\}$ - HMBC spectrum (aromatic resonances of mpp) of a mixture of *cis,trans*- $[\text{RuCl}_2(\text{dmsO-S})_2(\text{mpp-}\kappa\text{N}^p)]$  (**7**), and the two *cis,cis*- $[\text{RuCl}_2(\text{dmsO-S})_2(\text{mpp-}\kappa\text{N}^p)]$  isomers (**8** + **9**), with  $J = 11$  Hz in  $\text{CDCl}_3$ . See the inset of Figure 7S for numbering scheme and labels.

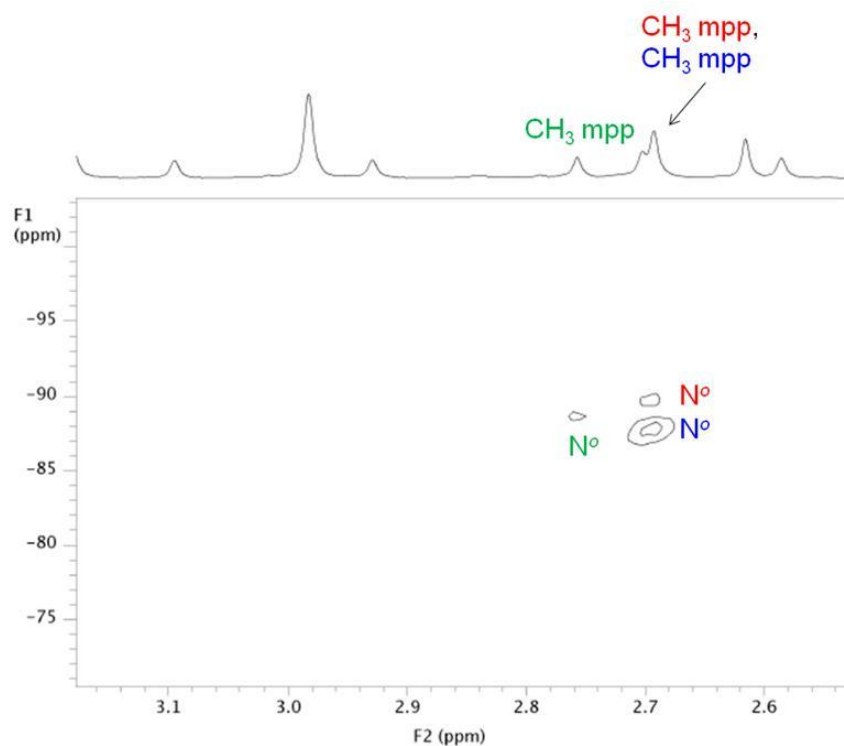

**Figure 15S.**  $\{^1\text{H}, ^{15}\text{N}\}$ - HMBC spectrum (region of methyl resonances) of a mixture of *cis,trans*- $[\text{RuCl}_2(\text{dms}\text{o-}S)_2(\text{mpp-}\kappa N^P)]$  (**7**), and the two *cis,cis*- $[\text{RuCl}_2(\text{dms}\text{o-}S)_2(\text{mpp-}\kappa N^P)]$  isomers (**8 + 9**), with  $J = 1.8$  Hz in  $\text{CDCl}_3$ . See the inset of Figure 7S for numbering scheme and labels.

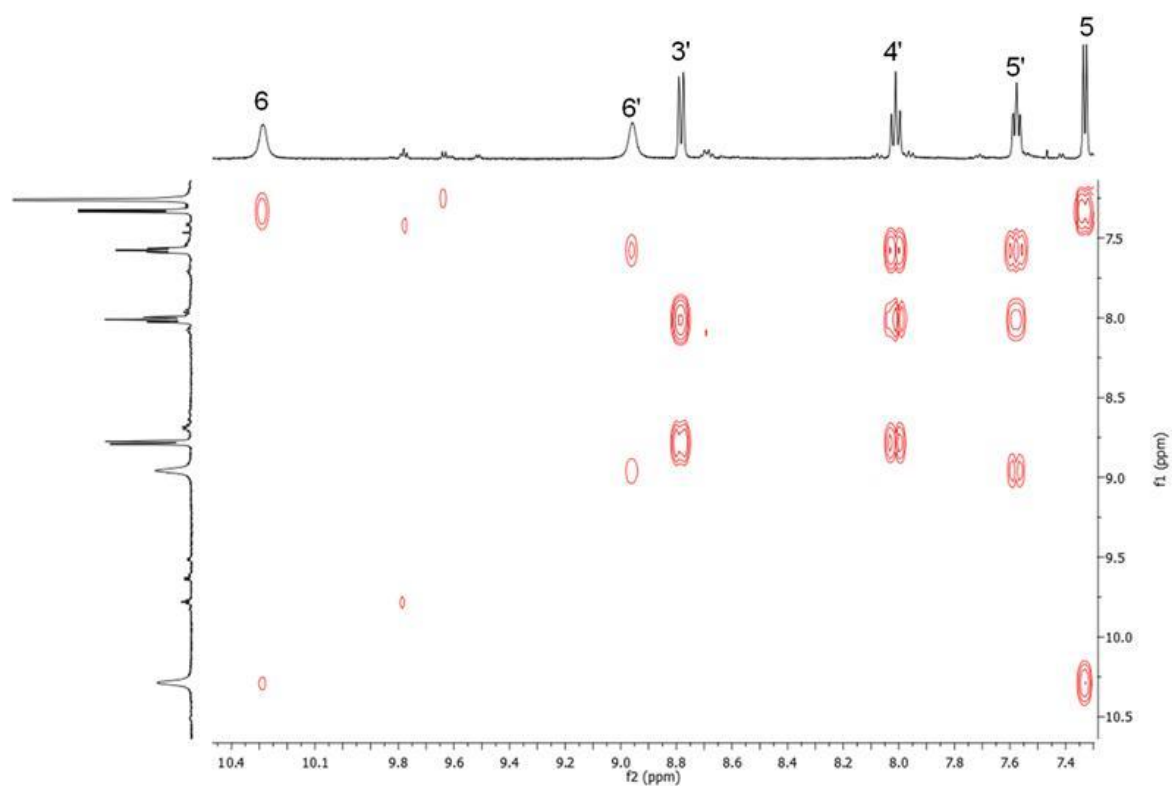

**Figure 16S.** H-H COSY NMR spectrum (aromatic region) of *trans,cis*- $[\text{RuCl}_2(\text{dms}\text{o-}S)_2(\text{mpp-}\kappa N^P)]$  (**10**) in  $\text{CDCl}_3$ . See the inset of Figure 7S for numbering scheme.

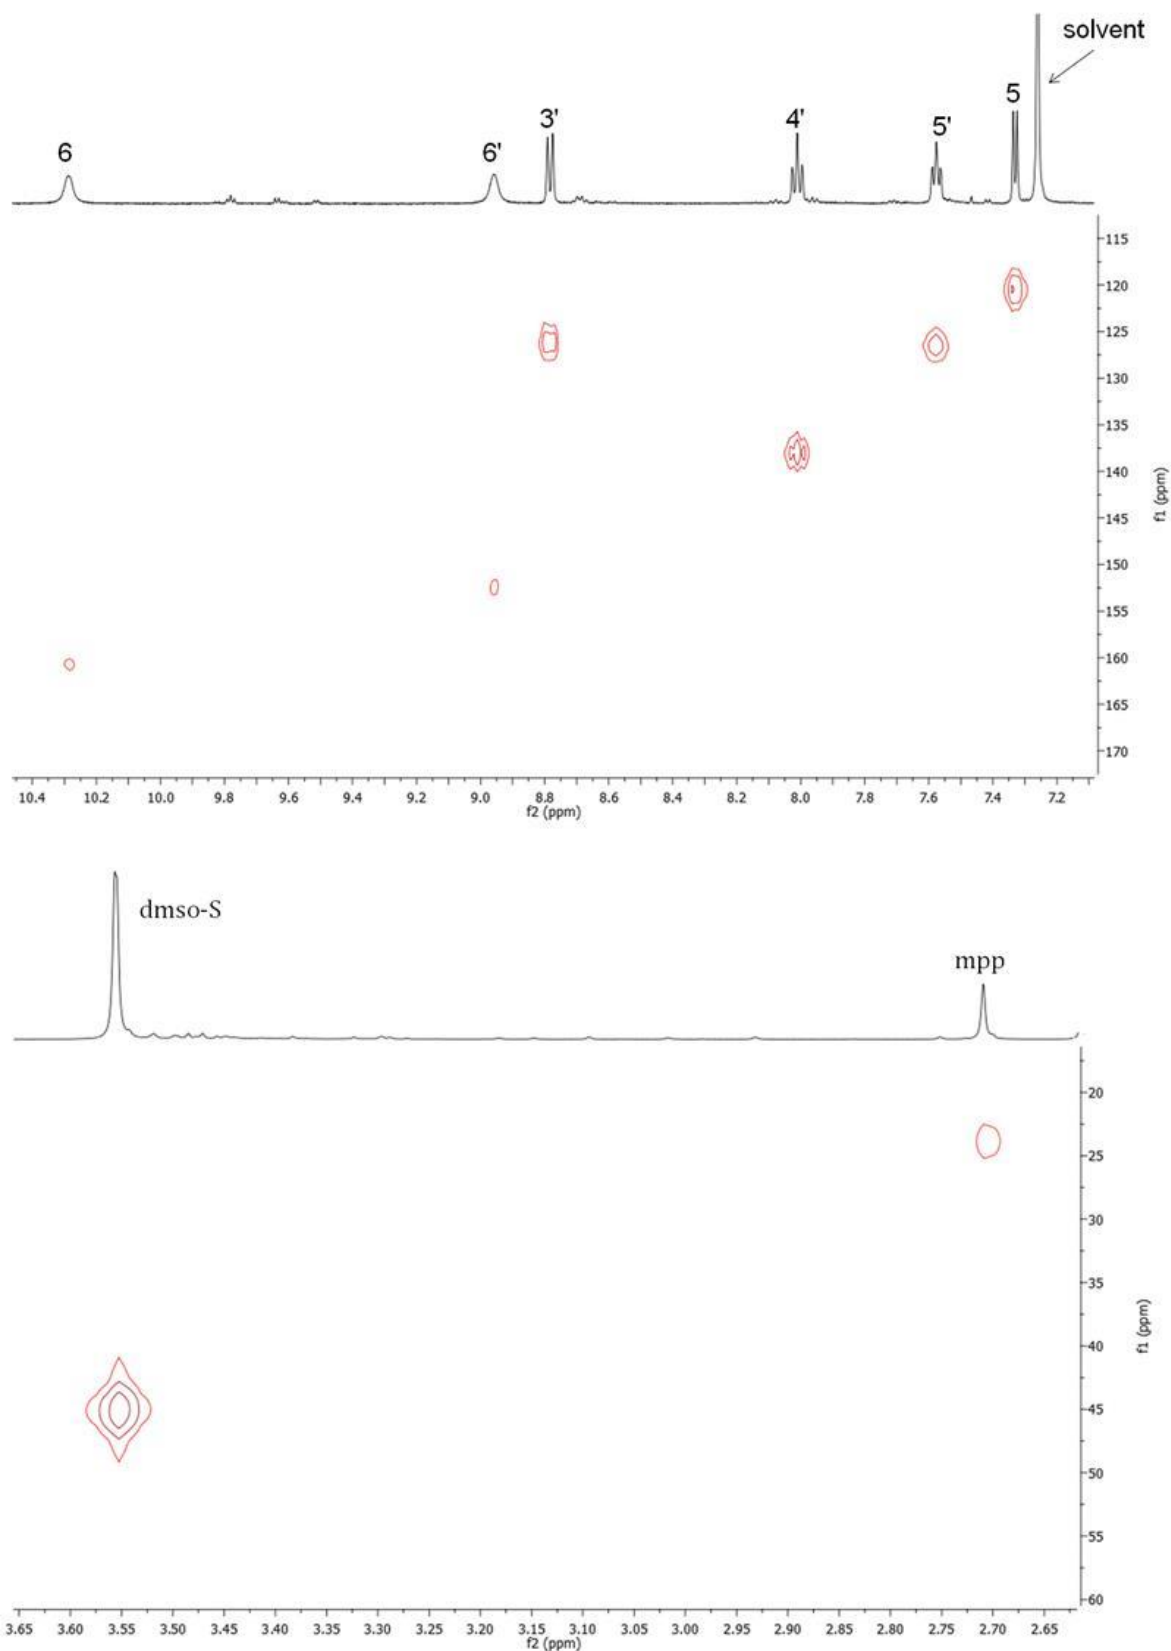

**Figure 17S.** HSQC NMR spectrum of *trans,cis*-[RuCl<sub>2</sub>(dmsO-S)<sub>2</sub>(mpp-κN<sup>P</sup>)] (**10**) in CDCl<sub>3</sub>: aromatic region (top) and methyl region (bottom). See the inset of Figure 7S for numbering scheme.

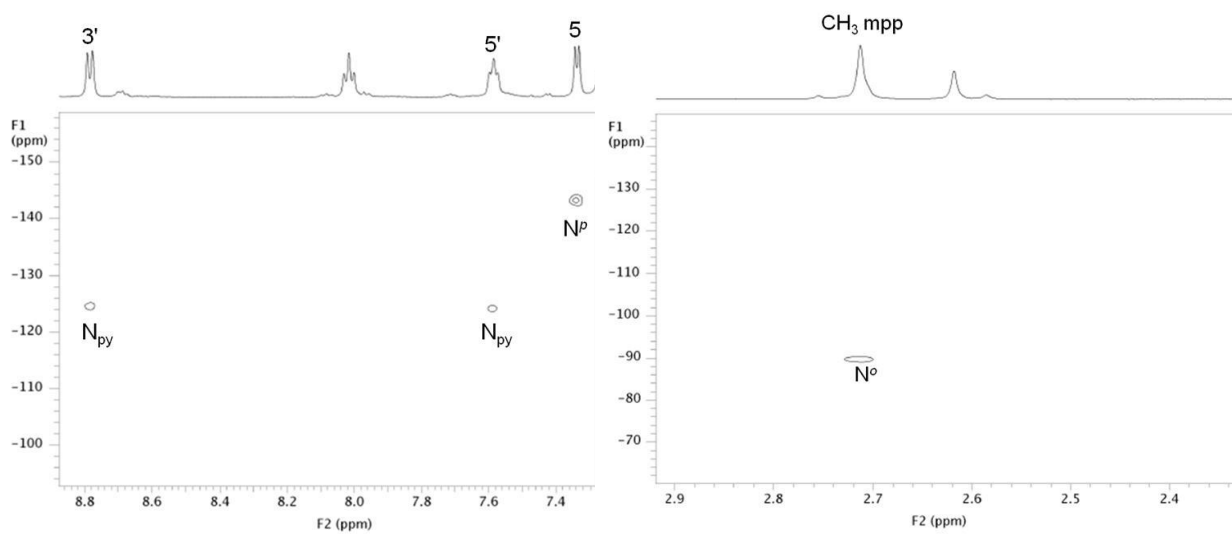

**Figure 18S.**  $\{^1\text{H}, ^{15}\text{N}\}$ - HMBC spectrum of *trans,cis*- $[\text{RuCl}_2(\text{dmsO-S})_2(\text{mpp-}\kappa\text{N}^P)]$  (**10**) with  $J = 11$  Hz in  $\text{CDCl}_3$ . Left: region of the aromatic resonances of mpp; right: region of methyl resonances. See the inset of Figure 7S for numbering scheme and labels.

### X-ray structure of 5/5Me

As said in the text, when the preparation of **5** was performed in methanol part of the carboxylate groups of coordinated cppH are methylated and a mixture of *trans,cis*-[RuCl<sub>2</sub>(CO)<sub>2</sub>(cppH-κN<sup>p</sup>)] (**5**) and *trans,cis*-[RuCl<sub>2</sub>(CO)<sub>2</sub>(cppCH<sub>3</sub>-κN<sup>p</sup>)] (**5Me**) cocrystallizes. The fraction of molecules with esterified cppH has been estimated at 55%. The X-ray structures of **5**, **5Me**, and of the mixture **5/5Me** after refinement are shown in Figure 19S.

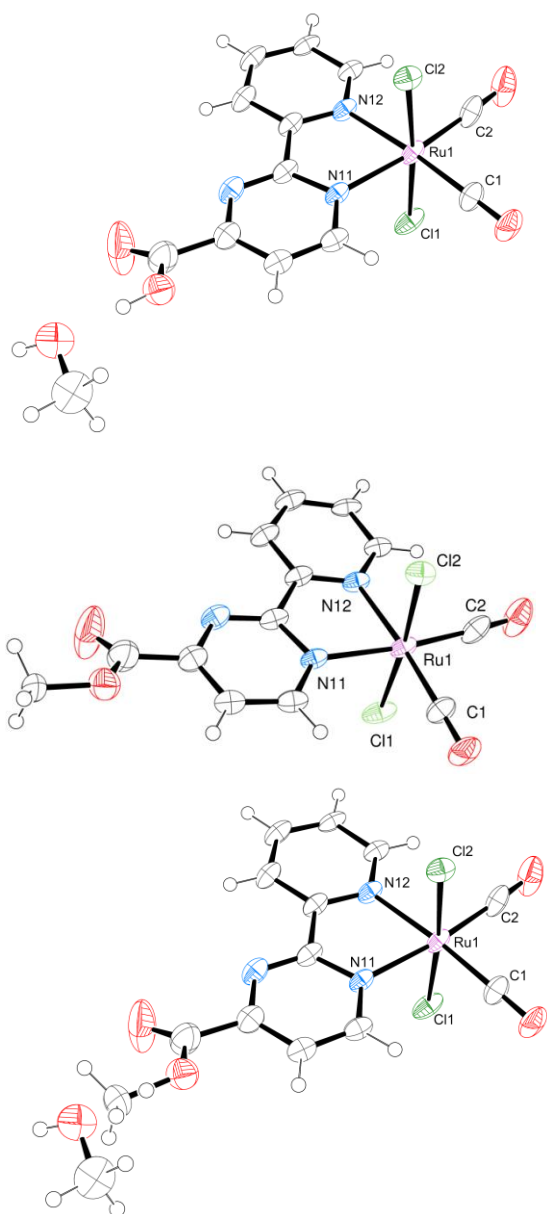

**Figure 19S.** X-ray structures (50% probability ellipsoids) of *trans,cis*-[RuCl<sub>2</sub>(CO)<sub>2</sub>(cppH-κN<sup>p</sup>)] (**5**, top), *trans,cis*-[RuCl<sub>2</sub>(CO)<sub>2</sub>(cppCH<sub>3</sub>-κN<sup>p</sup>)] (**5Me**, middle), and of the 45/55 mixture **5/5Me** (bottom). The fraction of the ASU with a free carboxylic acid moiety shows hydrogen bonding with a methanol molecule.

Crystal packing shows that **5** molecules in **5/5Me** crystals are grouped in closely arranged pillars, through  $\pi$ - $\pi$  stacking interactions. Carboxylate groups are exposed to form channels parallel to unit cell *a* axis, where methanol molecules are coordinated through hydrogen bonds (Figure 20S). The crystal packings of compounds **7** and **8** show dipole interactions among coordinated dms<sub>o</sub>-S ligands of neighbor complexes. No solvent molecules were found in these crystals.

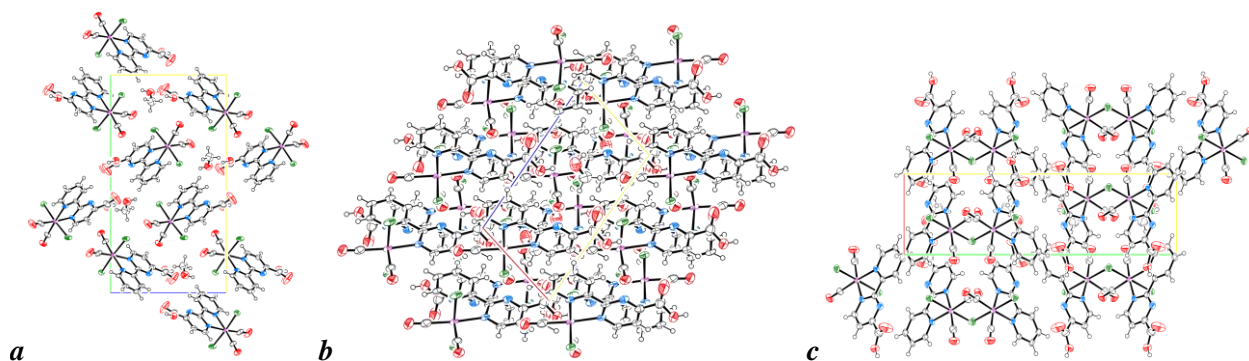

**Figure 20S.** Crystal packing views of **5/5Me** along the crystallographic *a*, *b* and *c* axis, respectively.



**Table 1S.** Crystallographic data and refinement details for compounds *trans,cis*-[RuCl<sub>2</sub>(CO)<sub>2</sub>(cppH-κN<sup>p</sup>)] + *trans,cis*-[RuCl<sub>2</sub>(CO)<sub>2</sub>(cppCH<sub>3</sub>-κN<sup>p</sup>)] (**5/5Me**, crystals obtained from MeOH), and *trans,cis*-[RuCl<sub>2</sub>(CO)<sub>2</sub>(cppH-κN<sup>p</sup>)] (**5**, crystals obtained from water).

|                               | <b>5/5Me</b>                                                                                                                                                                                         | <b>5</b>                                                                                         |
|-------------------------------|------------------------------------------------------------------------------------------------------------------------------------------------------------------------------------------------------|--------------------------------------------------------------------------------------------------|
| Empirical Formula             | 0.45(C <sub>12</sub> H <sub>7</sub> Cl <sub>2</sub> N <sub>3</sub> O <sub>4</sub> Ru) 0.45CH <sub>3</sub> OH + 0.55(C <sub>13</sub> H <sub>9</sub> Cl <sub>2</sub> N <sub>3</sub> O <sub>4</sub> Ru) | C <sub>12</sub> H <sub>7</sub> Cl <sub>2</sub> N <sub>3</sub> O <sub>4</sub> Ru·H <sub>2</sub> O |
| Formula weight (Da)           | 451.31                                                                                                                                                                                               | 447.19                                                                                           |
| Temperature (K)               | 100(2)                                                                                                                                                                                               | 100(2)                                                                                           |
| Wavelength (Å)                | 0.700                                                                                                                                                                                                | 0.700                                                                                            |
| Crystal system                | Monoclinic                                                                                                                                                                                           | Monoclinic                                                                                       |
| Space Group                   | <i>P</i> 2 <sub>1</sub> / <i>c</i>                                                                                                                                                                   | <i>P</i> 2 <sub>1</sub> / <i>a</i>                                                               |
| <i>a</i> (Å)                  | 6.564(1)                                                                                                                                                                                             | 13.4180(10)                                                                                      |
| <i>b</i> (Å)                  | 21.643(4)                                                                                                                                                                                            | 8.254(3)                                                                                         |
| <i>c</i> (Å)                  | 11.766(2)                                                                                                                                                                                            | 15.2260(16)                                                                                      |
| α (°)                         | 90                                                                                                                                                                                                   | 90                                                                                               |
| β (°)                         | 103.35(3)                                                                                                                                                                                            | 111.383(3)                                                                                       |
| γ (°)                         | 90                                                                                                                                                                                                   | 90                                                                                               |
| <i>V</i> (Å <sup>3</sup> )    | 1626.4(6)                                                                                                                                                                                            | 1570.2(5)                                                                                        |
| <i>Z</i>                      | 4                                                                                                                                                                                                    | 4                                                                                                |
| ρ (g·cm <sup>-3</sup> )       | 1.843                                                                                                                                                                                                | 1.892                                                                                            |
| F(000)                        | 890                                                                                                                                                                                                  | 880                                                                                              |
| μ (mm <sup>-1</sup> )         | 1.247                                                                                                                                                                                                | 1.293                                                                                            |
| θ min,max (°)                 | 1.8, 29.1                                                                                                                                                                                            | 1.415, 28.760                                                                                    |
| Resolution (Å)                | 0.72                                                                                                                                                                                                 | 0.73                                                                                             |
| Total refl. collectd          | 28444                                                                                                                                                                                                | 24489                                                                                            |
| Independent refl.             | 4507                                                                                                                                                                                                 | 4112                                                                                             |
| Obs. Refl. [Fo>4σ(Fo)]        | 4264                                                                                                                                                                                                 | 3689                                                                                             |
| I/σ(I) (all data)             | 39.3                                                                                                                                                                                                 | 21.75                                                                                            |
| I/σ(I) (max resltn)           | 25.2                                                                                                                                                                                                 | 14.24                                                                                            |
| Completeness (all data)       | 0.99                                                                                                                                                                                                 | 0.970                                                                                            |
| Completeness (max resltn)     | 0.97                                                                                                                                                                                                 | 0.962                                                                                            |
| Rmerge (all data)             | 0.027                                                                                                                                                                                                | 0.053                                                                                            |
| Rmerge (max resltn)           | 0.052                                                                                                                                                                                                | 0.091                                                                                            |
| Multiplicity (all data)       | 6.0                                                                                                                                                                                                  | 5.8                                                                                              |
| Multiplicity (max resltn)     | 6.1                                                                                                                                                                                                  | 4.8                                                                                              |
| Data/restraint/parameters     | 4507/8/230                                                                                                                                                                                           | 4112/3/215                                                                                       |
| Goof                          | 1.194                                                                                                                                                                                                | 1.052                                                                                            |
| R[I>2.0σ(I)], wR2 [I>2.0σ(I)] | 0.0457, 0.1015                                                                                                                                                                                       | 0.0428, 0.1182                                                                                   |
| R (all data), wR2 (all data)  | 0.0483, 0.1031                                                                                                                                                                                       | 0.0475, 0.1239                                                                                   |

**Table 1S cntd.** Crystallographic data and refinement details for compounds *cis,trans*-[RuCl<sub>2</sub>(dms<sub>o</sub>-S)<sub>2</sub>(m<sub>pp</sub>-κN<sup>p</sup>)] (**7**), and *cis,cis*-[RuCl<sub>2</sub>(dms<sub>o</sub>-S)<sub>2</sub>(m<sub>pp</sub>-κN<sup>p</sup>)] (**8**), and *trans,cis*-[RuCl<sub>2</sub>(dms<sub>o</sub>-S)<sub>2</sub>(m<sub>pp</sub>-κN<sup>p</sup>)] (**10**).

|                               | <b>7</b>                                                                                       | <b>8</b>                                                                                       | <b>10</b>                                                                                                             |
|-------------------------------|------------------------------------------------------------------------------------------------|------------------------------------------------------------------------------------------------|-----------------------------------------------------------------------------------------------------------------------|
| Empirical Formula             | C <sub>14</sub> H <sub>21</sub> Cl <sub>2</sub> N <sub>3</sub> O <sub>2</sub> RuS <sub>2</sub> | C <sub>14</sub> H <sub>21</sub> Cl <sub>2</sub> N <sub>3</sub> O <sub>2</sub> RuS <sub>2</sub> | C <sub>14</sub> H <sub>21</sub> Cl <sub>2</sub> N <sub>3</sub> O <sub>2</sub> RuS <sub>2</sub> ·1/3CH <sub>3</sub> OH |
| Formula weight (Da)           | 499.43                                                                                         | 499.43                                                                                         | 510.11                                                                                                                |
| Temperature (K)               | 100(2)                                                                                         | 100(2)                                                                                         | 100(2)                                                                                                                |
| Wavelength (Å)                | 0.700                                                                                          | 0.700                                                                                          | 0.700                                                                                                                 |
| Crystal system                | Triclinic                                                                                      | Monoclinic                                                                                     | Trigonal                                                                                                              |
| Space Group                   | <i>P</i> −1                                                                                    | <i>P</i> 2 <sub>1</sub> / <i>c</i>                                                             | <i>R</i> −3                                                                                                           |
| a (Å)                         | 8.275(2)                                                                                       | 13.0180(4)                                                                                     | 23.0660(14)                                                                                                           |
| b (Å)                         | 9.618(2)                                                                                       | 8.2120(8)                                                                                      | 23.0660(14)                                                                                                           |
| c (Å)                         | 12.681(3)                                                                                      | 17.5210(4)                                                                                     | 19.425(4)                                                                                                             |
| α (°)                         | 82.67(3)                                                                                       | 90                                                                                             | 90                                                                                                                    |
| β (°)                         | 73.04(3)                                                                                       | 91.93(2)                                                                                       | 90                                                                                                                    |
| γ (°)                         | 78.60(3)                                                                                       | 90                                                                                             | 120                                                                                                                   |
| V (Å <sup>3</sup> )           | 943.7(4)                                                                                       | 1872.0(2)                                                                                      | 8950(2)                                                                                                               |
| Z                             | 2                                                                                              | 4                                                                                              | 18                                                                                                                    |
| ρ (g·cm <sup>−3</sup> )       | 1.758                                                                                          | 1.772                                                                                          | 1.704                                                                                                                 |
| F(000)                        | 504                                                                                            | 1008                                                                                           | 4644                                                                                                                  |
| μ (mm <sup>−1</sup> )         | 1.275                                                                                          | 1.285                                                                                          | 1.225                                                                                                                 |
| θ min,max (°)                 | 2.1, 30.0                                                                                      | 2.9, 31.0                                                                                      | 1.440, 28.184                                                                                                         |
| Resolution (Å)                | 0.70                                                                                           | 0.68                                                                                           | 0.74                                                                                                                  |
| Total refl. collectd          | 51595                                                                                          | 23331                                                                                          | 48116                                                                                                                 |
| Independent refl.             | 5690                                                                                           | 6013                                                                                           | 4993                                                                                                                  |
| Obs. Refl. [Fo>4σ(Fo)]        | 5387                                                                                           | 5677                                                                                           | 4846                                                                                                                  |
| I/σ(I) (all data)             | 27.6                                                                                           | 28.7                                                                                           | 59.25                                                                                                                 |
| I/σ(I) (max resltn)           | 14.5                                                                                           | 20.3                                                                                           | 43.60                                                                                                                 |
| Completeness (all data)       | 1.00                                                                                           | 0.97                                                                                           | 0.973                                                                                                                 |
| Completeness (max resltn)     | 1.00                                                                                           | 0.86                                                                                           | 0.977                                                                                                                 |
| Rmerge (all data)             | 0.037                                                                                          | 0.033                                                                                          | 0.028                                                                                                                 |
| Rmerge (max resltn)           | 0.067                                                                                          | 0.038                                                                                          | 0.036                                                                                                                 |
| Multiplicity (all data)       | 4.4                                                                                            | 3.9                                                                                            | 9.7                                                                                                                   |
| Multiplicity (max resltn)     | 3.2                                                                                            | 3.1                                                                                            | 9.1                                                                                                                   |
| Data/restraint/parameters     | 5690/0/224                                                                                     | 6013/0/222                                                                                     | 4993/11/242                                                                                                           |
| Goof                          | 1.138                                                                                          | 1.058                                                                                          | 1.246                                                                                                                 |
| R[I>2.0σ(I)], wR2 [I>2.0σ(I)] | 0.0364, 0.0779                                                                                 | 0.0247, 0.0619                                                                                 | 0.0367, 0.1289                                                                                                        |
| R (all data), wR2 (all data)  | 0.0386, 0.0789                                                                                 | 0.0263, 0.0629                                                                                 | 0.0373, 0.1298                                                                                                        |

**Table 2S.** Selected coordination distances (Å) and angles (°) for *trans,cis*-[RuCl<sub>2</sub>(CO)<sub>2</sub>(cppH-κ<sup>N</sup>)] (5).

| <b>Bond distances (Å)</b> |            |             |           |
|---------------------------|------------|-------------|-----------|
| Ru1–N1                    | 2.112(2)   | Ru1–C1      | 1.891(3)  |
| Ru1–N2                    | 2.103(2)   | Ru1–C2      | 1.900(3)  |
| Ru1–Cl1                   | 2.3819(7)  | Ru1–Cl2     | 2.4010(7) |
| <b>Bond angles (°)</b>    |            |             |           |
| N1–Ru1–N2                 | 77.68(8)   | N2–Ru1–Cl2  | 88.09(6)  |
| N1–Ru1–Cl1                | 85.30(6)   | Cl1–Ru1–C1  | 91.71(9)  |
| N1–Ru1–C1                 | 99.63(11)  | Cl1–Ru1–C2  | 93.21(9)  |
| N1–Ru1–C2                 | 173.84(10) | Cl1–Ru1–Cl2 | 171.22(2) |
| N1–Ru1–Cl2                | 87.11(6)   | C1–Ru1–C2   | 86.37(13) |
| N2–Ru1–Cl1                | 85.98(6)   | C1–Ru1–Cl2  | 93.91(9)  |
| N2–Ru1–C1                 | 176.57(10) | C2–Ru1–Cl2  | 93.88(9)  |
| N2–Ru1–C2                 | 96.27(10)  |             |           |

**Table 3S.** Selected coordination distances (Å) and angles (°) for *trans,cis*-[RuCl<sub>2</sub>(CO)<sub>2</sub>(cppCH<sub>3</sub>-κN<sup>p</sup>)] (5Me).

| <b>Bond distances (Å)</b> |          |             |           |
|---------------------------|----------|-------------|-----------|
| Ru1–N11                   | 2.124(3) | Ru1–C2      | 1.880(5)  |
| Ru1–N12                   | 2.113(3) | Ru1–C1      | 1.874(4)  |
| Ru1–Cl2                   | 2.396(1) | Ru1–Cl1     | 2.388(1)  |
| <b>Bond angles (°)</b>    |          |             |           |
| N11–Ru1–N12               | 77.4(1)  | N12–Ru1–Cl1 | 88.76(9)  |
| N11–Ru1–Cl2               | 87.50(8) | Cl2–Ru1–C2  | 92.2(1)   |
| N11–Ru1–C2                | 172.8(1) | Cl2–Ru1–C1  | 91.8(1)   |
| N11–Ru1–C1                | 97.3(2)  | Cl2–Ru1–Cl1 | 175.18(4) |
| N11–Ru1–Cl1               | 88.24(8) | C2–Ru1–C1   | 89.9(2)   |
| N12–Ru1–Cl2               | 88.10(9) | C2–Ru1–Cl1  | 91.8(2)   |
| N12–Ru1–C2                | 95.4(2)  | C1–Ru1–Cl1  | 91.0(1)   |
| N12–Ru1–C1                | 174.7(2) |             |           |

**Table 4S.** Selected coordination distances (Å) and angles (°) for *cis,trans*-[RuCl<sub>2</sub>(dmsO-S)<sub>2</sub>(mpp-κN<sup>p</sup>)] (7).

| <b>Bond distances (Å)</b> |           |             |           |
|---------------------------|-----------|-------------|-----------|
| Ru1–N11                   | 2.057(2)  | Ru1–Cl1     | 2.426(1)  |
| Ru1–N12                   | 2.056(3)  | Ru1–Cl2     | 2.427(1)  |
| Ru1–S1                    | 2.2981(9) | Ru1–S2      | 2.2977(9) |
| <b>Bond angles (°)</b>    |           |             |           |
| N11–Ru1–N12               | 79.03(9)  | N12–Ru1–S2  | 89.10(7)  |
| N11–Ru1–S1                | 91.75(6)  | S1–Ru1–Cl1  | 89.16(3)  |
| N11–Ru1–Cl1               | 173.46(6) | S1–Ru1–Cl2  | 89.01(3)  |
| N11–Ru1–Cl2               | 94.21(6)  | S1–Ru1–S2   | 177.71(3) |
| N11–Ru1–S2                | 89.47(6)  | Cl1–Ru1–Cl2 | 92.28(3)  |
| N12–Ru1–S1                | 93.04(7)  | Cl1–Ru1–S2  | 89.85(3)  |
| N12–Ru1–Cl1               | 94.45(7)  | Cl2–Ru1–S2  | 88.97(2)  |
| N12–Ru1–Cl2               | 172.99(7) |             |           |

**Table 5S.** Selected coordination distances (Å) and angles (°) for *cis,cis*-[RuCl<sub>2</sub>(dmsO-S)<sub>2</sub>(mpp-κN<sup>p</sup>)] (8).

| <b>Bond distances (Å)</b> |            |             |           |
|---------------------------|------------|-------------|-----------|
| Ru1–N11                   | 2.0525(12) | Ru1–Cl2     | 2.4193(4) |
| Ru1–N12                   | 2.1025(12) | Ru1–S1      | 2.2742(4) |
| Ru1–Cl1                   | 2.4396(4)  | Ru1–S2      | 2.2441(4) |
| <b>Bond angles (°)</b>    |            |             |           |
| N11–Ru1–N12               | 78.11(5)   | N12–Ru1–S2  | 93.51(4)  |
| N11–Ru1–Cl1               | 87.61(4)   | Cl1–Ru1–Cl2 | 92.84(1)  |
| N11–Ru1–Cl2               | 170.83(3)  | Cl1–Ru1–S1  | 87.67(2)  |
| N11–Ru1–S1                | 98.64(4)   | Cl1–Ru1–S2  | 176.52(1) |
| N11–Ru1–S2                | 90.02(4)   | Cl2–Ru1–S1  | 90.53(2)  |
| N12–Ru1–Cl1               | 83.52(4)   | Cl2–Ru1–S2  | 89.10(2)  |
| N12–Ru1–Cl2               | 92.83(4)   | S1–Ru1–S2   | 95.20(2)  |
| N12–Ru1–S1                | 170.71(4)  |             |           |

**Table 6S.** Selected coordination distances (Å) and angles (°) for *trans,cis*-[RuCl<sub>2</sub>(dmsO-S)<sub>2</sub>(mpp-κN<sup>p</sup>)] (10).

| <b>Bond distances (Å)</b> |            |             |             |
|---------------------------|------------|-------------|-------------|
| Ru1–N31                   | 2.1344(17) | Ru1–Cl2     | 2.3924(6)   |
| Ru1–N32                   | 2.1246(16) | Ru1–S1      | 2.3002(5)   |
| Ru1–Cl1                   | 2.3829(6)  | Ru1–S2      | 2.2646(5)   |
| <b>Bond angles (°)</b>    |            |             |             |
| N31–Ru1–N32               | 76.52(7)   | N32–Ru1–S2  | 97.74(5)    |
| N31–Ru1–Cl1               | 89.91(5)   | Cl1–Ru1–Cl2 | 176.075(18) |
| N31–Ru1–Cl2               | 87.43(5)   | Cl1–Ru1–S2  | 92.96(2)    |
| N31–Ru1–S1                | 95.66(5)   | Cl1–Ru1–S1  | 91.712(18)  |
| N31–Ru1–S2                | 173.44(5)  | Cl2–Ru1–S2  | 89.40(2)    |
| N32–Ru1–Cl1               | 86.64(4)   | Cl2–Ru1–S1  | 91.421(18)  |
| N32–Ru1–Cl2               | 89.94(4)   | S1–Ru1–S2   | 90.161(19)  |
| N32–Ru1–S1                | 172.00(5)  |             |             |
